# Supplementary material for: The radical anions and the electron affinities of perfluorinated benzene, naphthalene and anthraceneElectronic supplementary information (ESI) available: calculated energies and electron affinities for perfluorinated benzene, naphthalene and anthracene and their anions. Calculated structures for perfluorinated naphthalene and anthracene and their anions. See http://www.rsc.org/suppdata/cc/b2/b208831m/
Source: Royal Society of Chemistry journal article supplement (doi:10.1039/b208831m), 2002-11-28
Supplement: b208831m.doc [file b208831m.doc]

SUPPLEMENTARY MATERIAL

The Radical Anions and the Electron Affinities of Perfluorinated Benzene, Naphthalene, and Anthracene

Yaoming Xie and Henry F. Schaefer III

Center for Computational Quantum Chemistry

University of Georgia

Athens, Georgia 30602

F. Albert Cotton

Laboratory for Molecular Structure and Bonding

Department of Chemistry

Texas A & M University

College Station, Texas 77843-3255

Total energies for perfluorinated polycyclic aromatic hydrocarbons and their anions.

Perfluorobenzene -827.8281(D6h) -827.8388 (D6h)

-827.8533 (C2v)

Perfluoronaphthalene -1180.0085 (D2h) -1180.0455 (D2h)

-1180.0459 (C2h)

Perfluoroanthracene -1532.1467 (D2h) -1532.2059 (D2h)

(No diffuse basis functions)
